# Supplementary material for: Highly selective capture and efficient concentration of trace titanium dioxide nanoparticles in environmental waters by phosphorylated ferroferric oxide
Source: Royal Society of Chemistry journal article supplement (doi:10.1039/d4en00095a), 2024-01-01
Supplement: d4en00095a1.pdf [file d4en00095a1.pdf]

# Supporting Information for

## Highly Selective Capture and Efficient Concentration of Trace Titanium Dioxide Nanoparticles in Environmental Waters by Phosphorylated Ferroferric Oxide

*Ronggang Zheng, <sup>a,b</sup> Sujuan Yu, <sup>a,b</sup> Rui Yang, <sup>a,b</sup> Peng Li, <sup>a,b</sup> Qingcun Li, <sup>a,b</sup> Li Li, <sup>a,b</sup> Yuhang Chen, <sup>a</sup>  
Yaqi Cai, <sup>a,b</sup> and Jingfu Liu <sup>\*a,c,d</sup>*

<sup>a</sup> State Key Laboratory of Environmental Chemistry and Ecotoxicology, Research Center for Eco-Environmental Sciences, Chinese Academy of Sciences, P. O. Box 2871, Beijing 100085, China

<sup>b</sup> College of Resources and Environment, University of Chinese Academy of Sciences, Beijing, 100049, China

<sup>c</sup> School of Environment, Hangzhou Institute for Advanced Study, UCAS, Hangzhou 310024, China

<sup>d</sup> Institute of Environment and Health, Jiangnan University, Wuhan 430056, China

**Total pages: 13**

**Total figures: 5**

**Total tables: 5**

\*Corresponding author.

Tel.: +86–10–62849192; Fax: +86–10–62849192;

E-mail: [jfliu@rcees.ac.cn](mailto:jfliu@rcees.ac.cn)

**Contents of this file.**

**Figure S1.** The synthesis process of phosphorylated  $\text{Fe}_3\text{O}_4$ .

**Figure S2.** TEM images of  $\text{TiO}_2\text{NPs}$  with different size.

**Figure S3.** SEM images and size distributions of pristine  $\text{Fe}_3\text{O}_4$  and phosphorylated  $\text{Fe}_3\text{O}_4$ .

**Figure S4.** EDS spectra of  $\text{Fe}_3\text{O}_4$  particles at different synthesis stage.

**Figure S5.** Digital photo of  $\text{TiO}_2\text{NPs}$  extracted in deionized water (left) and solutions with  $\text{CaCl}_2$  (right); Recoveries of  $\text{TiO}_2\text{NPs}$  by adding different ions.

**Table S1.** ICP-MS instrumental parameters for the determination of Ti.

**Table S2.** Analytical performance of the proposed method.

**Table S3.** Comparison of analytical performance of this method with other analytical methods.

**Table S4.** The detailed characteristics of real water samples.

**Table S5.** Elemental content in filtrate after deionized water is filtered by stainless steel membranes.

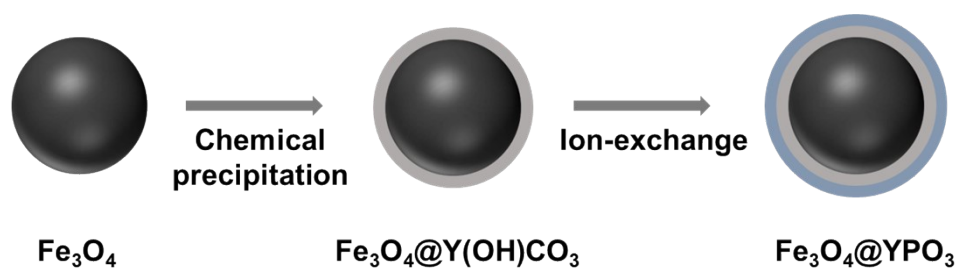

**Figure S1.** The synthesis process of phosphorylated  $\text{Fe}_3\text{O}_4$ .

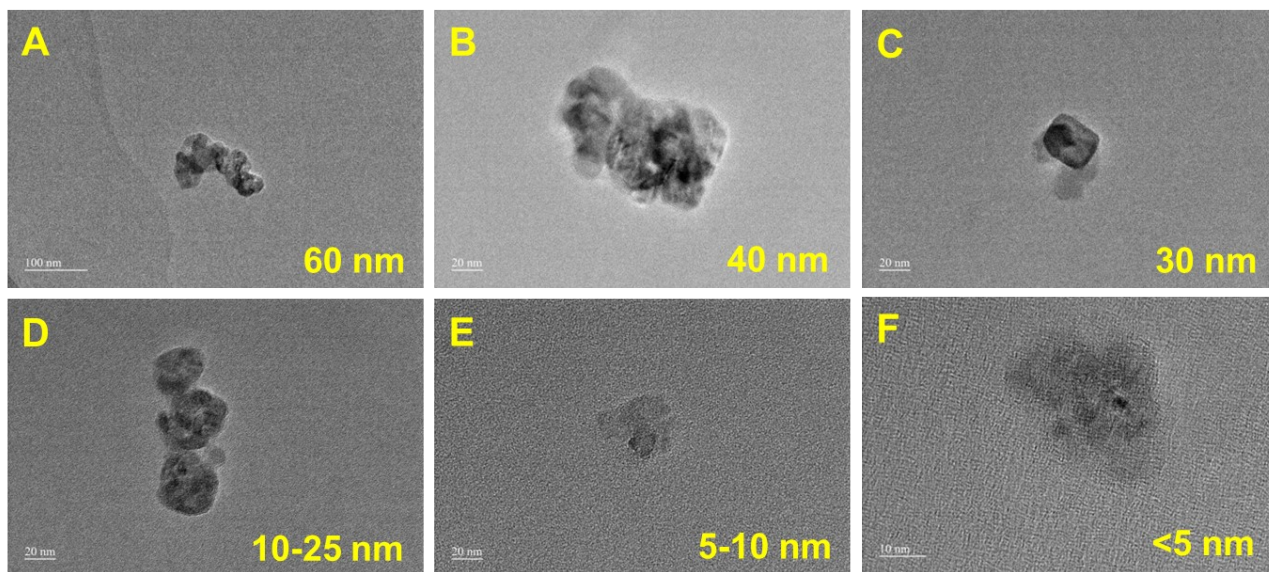

**Figure S2.** TEM images of  $\text{TiO}_2$ NPs with different size: (A) 60 nm; (B) 40 nm; (C) 30 nm; (D) 10–25 nm; (E) 5–10 nm, and (F) <5 nm.

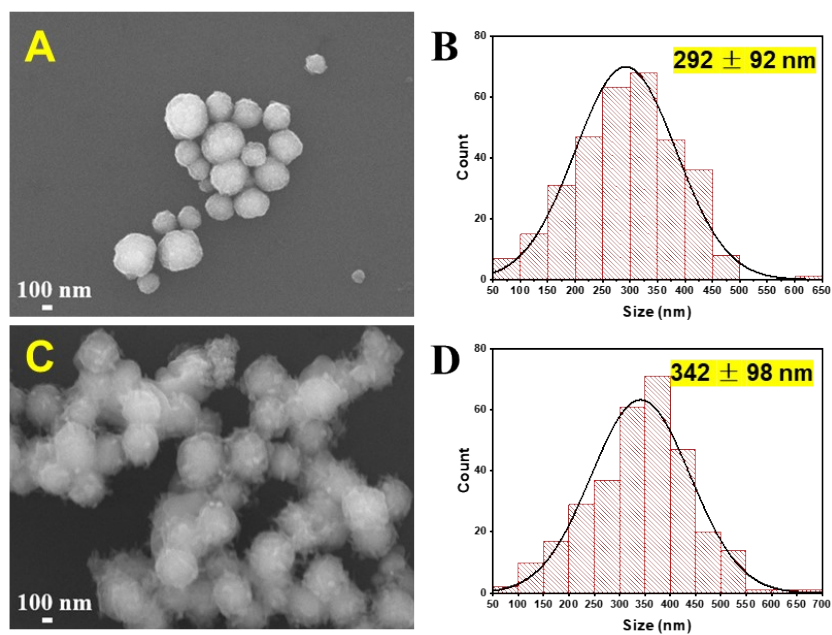

**Figure S3.** SEM images and size distributions of pristine Fe<sub>3</sub>O<sub>4</sub> (A and B) and phosphorylated Fe<sub>3</sub>O<sub>4</sub> (C and D).

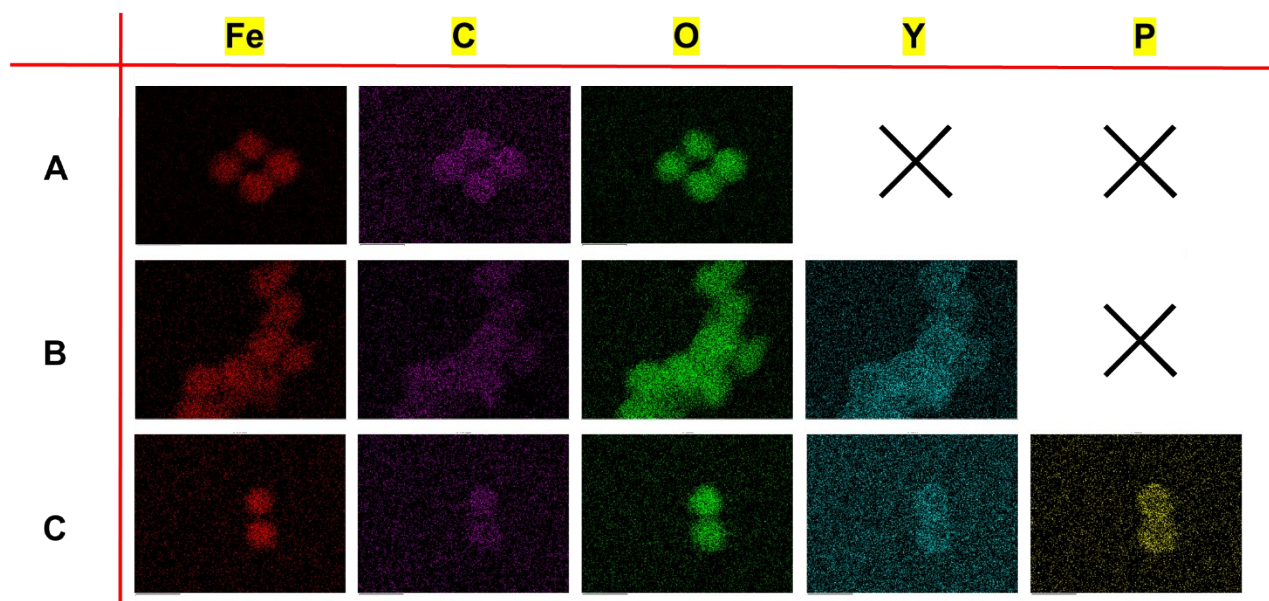

**Figure S4.** EDS spectra of  $\text{Fe}_3\text{O}_4$  particles at different synthesis stages: (A) pristine  $\text{Fe}_3\text{O}_4$ ; (B)  $\text{Fe}_3\text{O}_4$  modified with  $\text{Y}(\text{NO}_3)_3 \cdot 6\text{H}_2\text{O}$  and urea; (C) phosphorylated  $\text{Fe}_3\text{O}_4$ .

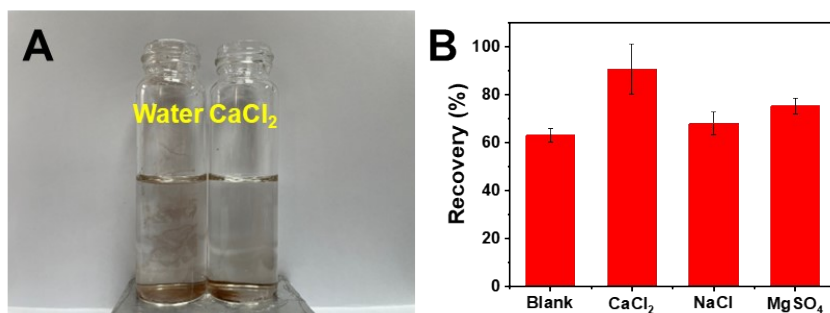

**Figure S5.** (A) Digital photo of TiO<sub>2</sub>NPs extracted in deionized water (left) and solutions with CaCl<sub>2</sub> (right). (B) Recoveries of TiO<sub>2</sub>NPs by adding different ions.

**Table S1.** ICP-MS instrumental parameters for the determination of Ti.

| Parameter                | Parameter value                               |
|--------------------------|-----------------------------------------------|
| Instrument               | Agilent 8900 ICP-MS                           |
| RF power                 | 1500 W                                        |
| Sampling depth           | 8 mm                                          |
| Carrier gas              | 1.05 L/min                                    |
| Reaction gas             | O <sub>2</sub> (25%)                          |
| Monitored isotopes (m/z) | <sup>48</sup> Ti <sup>16</sup> O <sup>+</sup> |

**Table S2.** Analytical performance of the proposed method.

| Species              | Linear range<br>( $\mu\text{g/L}$ ) | $R^2$  | Recovery<br>(%) | RSD (%,<br>$n=3$ ) | LOD<br>( $\text{ng/L}$ ) | LOQ<br>( $\text{ng/L}$ ) |
|----------------------|-------------------------------------|--------|-----------------|--------------------|--------------------------|--------------------------|
| TiO <sub>2</sub> NPs | 0.001–500                           | 0.9998 | 91.6            | 3.8                | 0.4                      | 1.4                      |

**Table S3.** Comparison of analytical performance of this method with other analytical methods.

| Method                                  | Size (nm) | Time   | Enrichment factor | LOD (µg/L) | Ref.      |
|-----------------------------------------|-----------|--------|-------------------|------------|-----------|
| Solvent microextraction-ICP-MS          | 19        | > 2 h  | 83                | 0.07       | 1         |
| Magnetic solid phase extraction-ICP-AES | 25-100    | 22 min | -                 | 20         | 2         |
| Capillary microextraction-ICP-MS        | 5-100     | 10 min | 10                | 0.63       | 3         |
| Magnetic solid phase extraction-ICP-MS  | 5-100     | 25 min | 400               | 0.017      | 4         |
| Magnetic microextraction-ICP-MS         | <5-100    | -      | 1000              | 0.0004     | This work |

**Table S4.** The detailed characteristics of real water samples.

| Sample            | pH  | K <sup>+</sup><br>(mg/L) | Na <sup>+</sup><br>(mg/L) | Ca <sup>2+</sup><br>(mg/L) | Mg <sup>2+</sup><br>(mg/L) | DOM<br>(mg C/L) |
|-------------------|-----|--------------------------|---------------------------|----------------------------|----------------------------|-----------------|
| Drinking<br>water | 7.8 | 0.32                     | 1.73                      | 0.13                       | 0.04                       | 0.04            |
| Spring water      | 8.1 | 4.58                     | 6.90                      | 40.95                      | 13.72                      | 1.43            |
| River 1           | 8.1 | 12.55                    | 58.24                     | 77.36                      | 27.73                      | 4.81            |
| River 2           | 8.6 | 6.75                     | 59.33                     | 54.96                      | 33.83                      | 15.53           |
| Lake 1            | 8.2 | 5.50                     | 32.38                     | 75.03                      | 45.89                      | 12.71           |

**Table S5.** Elemental content in filtrate after deionized water is filtered by stainless steel membranes.

| Element | Monitored isotopes (m/z)         | Content (µg/L)  |
|---------|----------------------------------|-----------------|
| Al      | $^{27}\text{Al}^{16}\text{O}^+$  | ND <sup>a</sup> |
| Ti      | $^{48}\text{Ti}^{16}\text{O}^+$  | ND              |
| V       | $^{51}\text{V}^{16}\text{O}^+$   | 0.003           |
| Ga      | $^{71}\text{Ga}^{16}\text{O}^+$  | ND              |
| Nb      | $^{93}\text{Nb}^{16}\text{O}^+$  | 0.022           |
| Eu      | $^{153}\text{Eu}^{16}\text{O}^+$ | ND              |
| Ho      | $^{165}\text{Ho}^{16}\text{O}^+$ | ND              |
| Er      | $^{166}\text{Er}^{16}\text{O}^+$ | ND              |
| Tm      | $^{169}\text{Tm}^{16}\text{O}^+$ | ND              |
| Yb      | $^{174}\text{Yb}^{16}\text{O}^+$ | ND              |
| Ta      | $^{181}\text{Ta}^{16}\text{O}^+$ | ND              |

<sup>a</sup>: Below the LOD.

## References

1. S. M. Majedi, B. C. Kelly and H. K. Lee, Efficient hydrophobization and solvent microextraction for determination of trace nano-sized silver and titanium dioxide in natural waters, *Anal. Chim. Acta*, 2013, **789**, 47-57.
2. L. Shen, Y. Zhu, P. Zhang and H. Wang, Capturing of Nano-TiO<sub>2</sub> from complex mixtures by bisphosphonate-functionalized Fe<sub>3</sub>O<sub>4</sub> nanoparticles, *ACS Sustainable Chem. Eng.*, 2017, **5**, 1704-1710.
3. X. Liu, M. He, B. Chen and B. Hu, Monolithic capillary microextraction combined with ICP-MS for the determination of TiO<sub>2</sub> NPs in environmental water samples, *Talanta*, 2019, **197**, 334-340.
4. Y. Wang, B. Chen, B. Wang, M. He and B. Hu, Phosphoric acid functionalized magnetic sorbents for selective enrichment of TiO<sub>2</sub> nanoparticles in surface water followed by inductively coupled plasma mass spectrometry detection, *Sci. Total Environ.*, 2020, **703**, 135464.
